# Supplementary material for: Function-Driven Molecular Design Enabled by Instruction-Tuned Large Language Models
Source: Research Square preprint supplement (doi:10.21203/rs.3.rs-8819034/v1), 2026-02-12
Supplement: Supplementary file 1 [file Analysis.xlsx]

## Sheet: Sheet1
Instruct-G4	Q1	Q2	Q3	Q4	Q5	Q6	Q7	Q8
Semantic match	1	4	0	3	3	0	6	0
Valid SELFIES (off target)	9	6	10	7	7	7	4	10
Invalid SELFIES	0	0	0	0	0	0	0	0
Unrelated text	0	0	0	0	0	3	0	0
Semantic Precision	0.1	0.4	0	0.3	0.3	0	0.6	0
ChemE-G4	Q1	Q2	Q3	Q4	Q5	Q6	Q7	Q8
Semantic match	6	6	1	6	0	0	0	0
Valid SELFIES (off target)	3	3	3	3	3	3	3	3
Invalid SELFIES	0	0	0	0	0	0	0	0
Unrelated text	1	1	6	1	7	7	7	7
Semantic Precision	0.6	0.6	0.1	0.6	0	0	0	0
